# Supplementary material
Source: PubMed Central journal article supplement (PMC3530620)
Supplement: NIHMS422104-supplement-1.pdf [file NIHMS422104-supplement-1.pdf]

## Supplementary Figure, Tables and Note for:

### Mutations in *GNAL* cause primary torsion dystonia

Tania Fuchs<sup>1</sup>, Rachel Saunders-Pullman<sup>2,3</sup>, Ikuo Masuho<sup>4</sup>, Marta San Luciano<sup>5</sup>, Deborah Raymond<sup>2</sup>, Stewart Factor<sup>6</sup>, Anthony E. Lang<sup>7</sup>, Tsao-Wei Liang<sup>8</sup>, Richard M. Trosch<sup>9</sup>, Sierra White<sup>1</sup>, Edmond Ainehsazan<sup>1</sup>, Denis Herve<sup>10,11,12</sup>, Nutan Sharma<sup>13</sup>, Michelle E. Ehrlich<sup>14,15</sup>, Kirill A. Martemyanov<sup>4</sup>, Susan B. Bressman<sup>2,3</sup>, Laurie J. Ozelius<sup>1,14</sup>

<sup>1</sup> Department of Genetics and Genomic Sciences, Mount Sinai School of Medicine, New York, NY; <sup>2</sup> Department of Neurology, Beth Israel Medical Center, New York, NY; <sup>3</sup> Department of Neurology, Albert Einstein College of Medicine, Bronx, NY; <sup>4</sup> Department of Neuroscience, The Scripps Research Institute, Jupiter, FL; <sup>5</sup> Department of Neurology, University of California, San Francisco, CA; <sup>6</sup> Department of Neurology, Emory University School of Medicine, Atlanta, GA; <sup>7</sup> Division of Neurology, Toronto Western Hospital, Toronto, Canada; <sup>8</sup> Department of Neurology, Jefferson Hospital for Neuroscience, Philadelphia, PA; <sup>9</sup> Parkinson's and Movement Disorders Center, Southfield, MI; <sup>10</sup> Inserm UMR-S 839, F-75005 Paris, France ; <sup>11</sup> Institut du Fer a Moulin, F-75005 Paris, France; <sup>12</sup> Universite Pierre et Marie Curie, F-75005 Paris, France; <sup>13</sup> Department of Neurology, Massachusetts General Hospital, Boston, MA; <sup>14</sup> Department of Neurology, Mount Sinai School of Medicine, New York, NY; <sup>15</sup> Department of Pediatrics, Mount Sinai School of Medicine, New York, NY

**Figure 1**

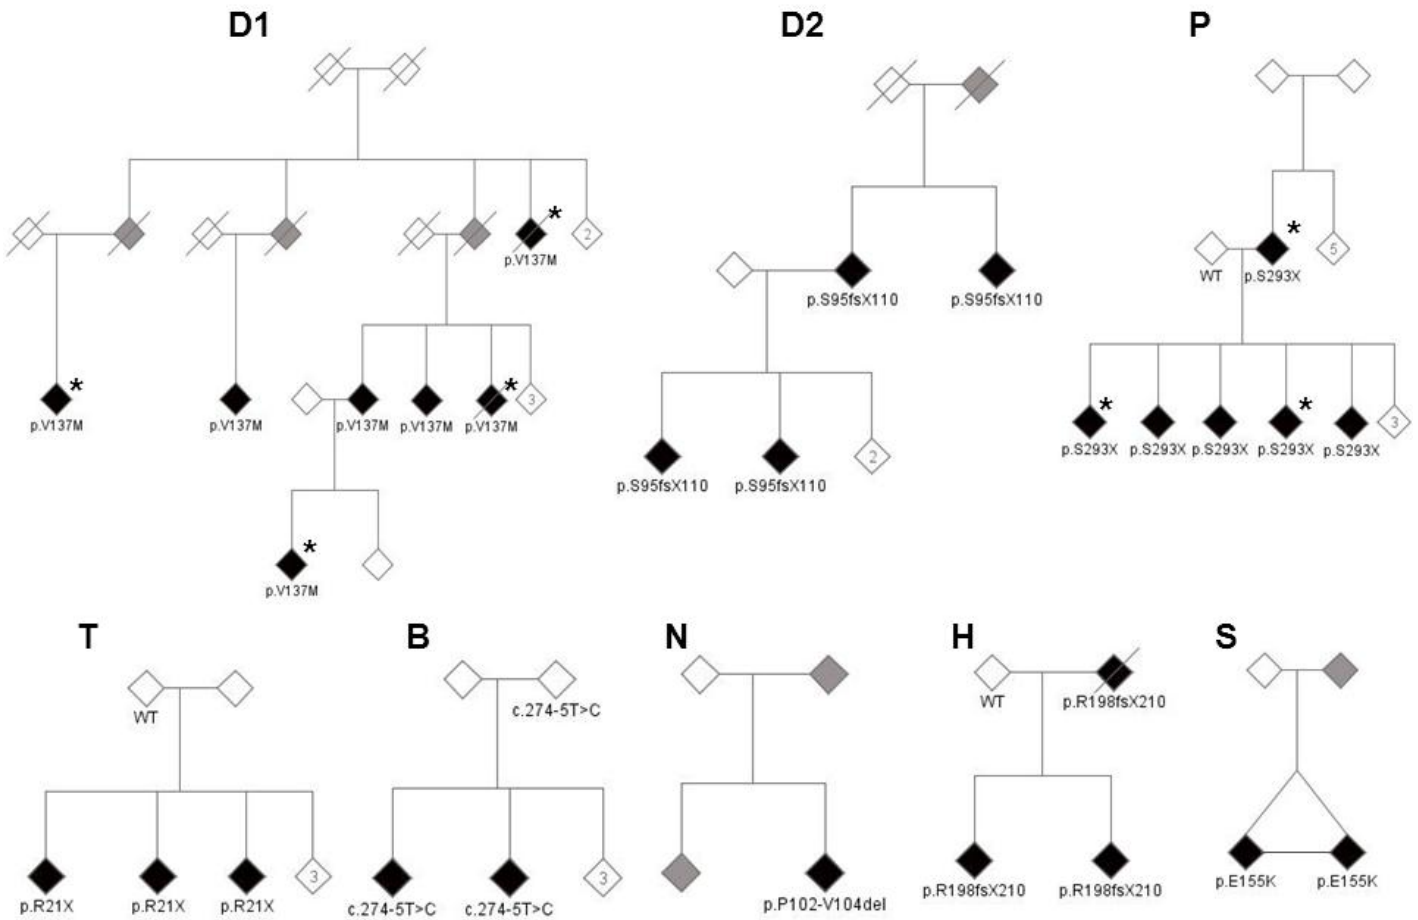

**Supplementary Figure 1.** Pedigrees of families with *GNAL* mutations. Filled in black symbols represent affected individuals, filled in grey symbols represent affected, known by history, diamond symbols with numbers represent additional sibs. WT indicates no mutation. Asterisks indicate the samples that were exome sequenced. Mutation status is indicated below the symbols for individuals whose DNA was available for testing. The pedigrees have been modified to protect the identities of the families.

**Supplementary Table 1. Sites Involved for 28 GNAL Patients from 8 Families.**

**SITES INVOLVED**

|                   | upper face | lower face | neck | larynx | pharynx | tongue | jaw | right arm | left arm | right leg | left leg | trunk | Dystonia distribution | Site of onset     |
|-------------------|------------|------------|------|--------|---------|--------|-----|-----------|----------|-----------|----------|-------|-----------------------|-------------------|
| <i>FAMILY D1*</i> |            |            |      |        |         |        |     |           |          |           |          |       |                       |                   |
| 1                 | •          | •          | •    |        |         | •      |     |           |          |           |          | •     | S                     | Neck              |
| 2                 | •          | •          | •    | •      |         | •      | •   | •         | •        |           |          | •     | S                     | Neck,Larynx,Trunk |
| 3                 | •          | •          | •    | •      |         |        |     |           |          |           |          |       | S                     | Neck              |
| 4^                |            |            | •    |        |         |        |     | •         | •        | •         | •        | •     | G                     | Legs              |
| 5                 | •          |            | •    |        |         |        |     |           |          |           |          | •     | S                     | Neck              |
| 6                 |            | •          | •    |        |         |        |     | •         |          |           |          |       | S                     | Neck              |
| 7                 | •          | •          | •    |        |         | •      | •   |           |          |           |          | •     | S                     | Neck, Face        |
| <i>FAMILY P *</i> |            |            |      |        |         |        |     |           |          |           |          |       |                       |                   |
| 1                 |            |            | •    |        |         |        |     |           |          |           |          |       | F                     | Neck              |
| 2                 |            |            | •    |        |         |        |     | •         | •        | •         | •        | •     | G                     | Neck              |
| 3                 |            |            | •    |        |         |        |     |           |          |           |          |       | F                     | Neck              |
| 4^                | •          |            | •    |        |         |        |     | •         | •        |           | •        | •     | G                     | Leg               |
| 5                 |            |            | •    |        |         |        |     | •         |          |           |          |       | S                     | Neck              |
| 6                 |            |            | •    |        |         |        |     |           |          |           |          |       | F                     | Neck              |
| <i>FAMILY S*</i>  |            |            |      |        |         |        |     |           |          |           |          |       |                       |                   |
| 1^                |            |            | •    |        |         |        |     |           |          |           |          |       | F                     | Neck              |
| 2                 |            | •          | •    |        |         |        | •   |           |          |           |          |       | S                     | Neck              |
| <i>FAMILY D2</i>  |            |            |      |        |         |        |     |           |          |           |          |       |                       |                   |
| 1                 | •          | •          | •    | •      |         |        | •   | •         |          |           |          | •     | S                     | Neck              |
| 2^                |            |            |      |        |         | •      | •   |           |          |           |          |       | S                     | Jaw               |
| 3                 | •          | •          | •    |        | •       | •      | •   | •         | •        |           |          |       | S                     | Neck              |
| 4                 |            |            |      |        |         | •      |     |           |          |           |          |       | F                     | Tongue            |
| <i>FAMILY H</i>   |            |            |      |        |         |        |     |           |          |           |          |       |                       |                   |
| 1                 |            |            | •    |        |         |        |     |           |          |           |          |       | F                     | Neck              |
| 2^                |            |            | •    |        |         |        |     |           |          |           |          |       | F                     | Neck              |
| 3                 |            |            | •    |        |         |        |     |           |          |           |          |       | F                     | Neck              |
| <i>FAMILY B</i>   |            |            |      |        |         |        |     |           |          |           |          |       |                       |                   |
| 1                 |            |            | •    |        |         |        |     |           |          |           |          |       | F                     | Neck              |
| 2^                |            |            | •    | •      |         |        |     | •         |          |           |          |       | S                     | Neck              |
| <i>FAMILY T</i>   |            |            |      |        |         |        |     |           |          |           |          |       |                       |                   |
| 1^                |            |            | •    |        |         |        |     |           |          |           |          |       | F                     | Neck              |
| 2                 |            |            | •    |        |         |        |     |           |          |           |          |       | F                     | Neck              |
| 3                 |            | •          | •    | •      |         |        | •   |           |          |           |          |       | S                     | Larynx            |
| <i>FAMILY N</i>   |            |            |      |        |         |        |     |           |          |           |          |       |                       |                   |
| 1^                |            |            | •    |        |         |        |     |           |          |           |          |       | F                     | Neck              |

Dystonia distribution: F – focal, S – segmental, M – multifocal, G – generalized  
 ^ Denoted probands

\* reported previously and updated here: Fam D1 in<sup>13,14,60</sup>, Fam P in<sup>14</sup> and<sup>15</sup>, Fam S in<sup>61</sup>.

The following are the corresponding identifiers from<sup>13</sup> for the individuals in D1:

1=individual 207, 2=302, 3=307, 4=304, 5=317, 6=315, 7=403.

**Supplementary Table 2.** Single Nucleotide Variants identified in Exome Sequencing.

| Family P Variants |        |        | Shared HZ | Novel against dbSNP132 | Annotation |    |      |        |
|-------------------|--------|--------|-----------|------------------------|------------|----|------|--------|
| 113               | 10831  | 10835  |           |                        | MS         | NS | UTRs | Others |
| 57,663            | 56,435 | 58,354 | 11,124    | 458                    | 68         | 1  | 13   | 376    |

| Family D1 Variants |        |        |        | Shared HZ | Novel against dbSNP132 | Annotation |    |      |        |
|--------------------|--------|--------|--------|-----------|------------------------|------------|----|------|--------|
| 10081              | 10097  | 10547  | 11484  |           |                        | MS         | NS | UTRs | Others |
| 57,185             | 59,975 | 62,412 | 58,148 | 4,578     | 208                    | 20         | 0  | 6    | 182    |

**Supplementary Table 3.** Indels identified in Family 1 exome sequencing.

| Family P Indel Variants |        |        | Shared HZ | Novel against dbSNP132 | In coding regions |
|-------------------------|--------|--------|-----------|------------------------|-------------------|
| 113                     | 10831  | 10835  |           |                        |                   |
| 11,861                  | 11,535 | 13,207 | 5,482     | 1,644                  | 79                |

**Supplementary Table 4.** Summary of Clinical features in *GNAL* mutation carriers.

|                                                   |                          |
|---------------------------------------------------|--------------------------|
|                                                   | Mutation positive (n=28) |
| Women (n,%)                                       | 14 (50%)                 |
| Mean age of onset <sup>1</sup> (years ±SD, range) | 31.32± 12.39(7-54)       |
| Mean age at final exam (years ±SD, range)         | 49.28 ± 13.30 (19-75)    |
| Site of onset                                     |                          |
| Arm                                               | 0 (0%)                   |
| Leg                                               | 2 (7.14%)                |

|                            |             |
|----------------------------|-------------|
| Cranial                    | 5 (17.86%)  |
| Face                       | 1 (3.57%)   |
| Jaw/Tongue                 | 2 (7.14%)   |
| Larynx                     | 2 (7.14%)   |
| Cervical                   | 23 (82.14%) |
| Sites at final examination |             |
| Arm                        | 9 (32.14%)  |
| Leg                        | 3 (10.71%)  |
| Cranial                    | 16 (57.14%) |
| Face <sup>1</sup>          | 13 (48.15%) |
| Jaw/Tongue <sup>1</sup>    | 10 (35.71%) |
| Larynx                     | 5 (17.86%)  |
| Cervical                   | 26 (92.86%) |
| Speech <sup>2</sup>        | 12 (44.44%) |

<sup>1</sup>Unratable facial, speech and final distribution in 1 *GNAL* carrier

**Supplementary Table 5.** Primers used in *GNAL* exon amplification.

| Exon               | Forward Primer             | Reverse Primer             | Annealing Temp. |
|--------------------|----------------------------|----------------------------|-----------------|
| NM_182978_5UTR     | GGCTCAGACGGCATTATTTACGGT   | TCTCCTTCGGCTTGTCTGCTTT     | 59              |
| NM_182978_ex1      | ATGGGTCTGTGCTACAGTCTGC     | AGAATCAGCCCGTAGTGTCTC      | 59              |
| NM_001142339_5UTR  | AGAAGCTGAGCAGAACAAAGGC     | AATAGAGAGTTGGAGACGTGTGCG   | 58              |
| NM_001142339_ex1-2 | AAACGCCTGCTCTGAATCGGAA     | ACRTCTGGGAGAGAGACGAAGTTT   | 59              |
| ex3-4              | AACCTTTGCRGATGTCTTGG       | CCTCTTATGCATTTAGAGAGCTGG   | 55              |
| ex5                | TCACACTAAACATAGAGTSGGTGCAT | TTATTCATTCCTTGCACTCAAG     | 57              |
| ex6                | ACTCACTTCAGCTTCTTGGCCT     | ATGACCAATCCACRCACACACA     | 59              |
| ex7                | ATGCTCGGCCAATGTTGGTT       | TGGGCCATGCAGCTCTTAACAA     | 58              |
| ex8                | ATGTGTGAACGCTGGAACCT       | GCAGTGCTGAGTGTTAGAATTCAC   | 56              |
| ex9                | TGCAGGCTGKTCTGTGACT        | AGAGATACTTCGTACGGTTCTGG    | 56              |
| ex10               | ACAGATGGAATGAGGATACTGGTG   | GGGATCCKATTACAAATAGGACCTTG | 56              |
| ex11               | GCTGGGAATATACAGCAGTCTAACR  | TGAAGTCTAGCCCATCCAAG       | 57              |
| ex12               | TGCATTGAGACCATTCTGCCT      | GGGAGGCYGTATTCAATGACAACA   | 59              |

**Supplementary Note:**

Human research subjects were recruited through advertisement or referral from movement disorder physicians. All families chosen for the study were multiplex of Northern European ancestry. All study subjects gave informed consent prior to participation, and the study was approved by all institutional review boards. Videotaped examinations and determination of affected status was undertaken as previously published<sup>11</sup>.

11. Bressman, S.B. et al. Idiopathic dystonia among Ashkenazi Jews: evidence for autosomal dominant inheritance. *Ann Neurol* 26, 612-20 (1989).
